# Supplementary material for: Evaluation of AGP Fucosylation as a Marker for Hepatocellular Carcinoma of Three Different Etiologies
Source: PubMed Central journal article supplement (PMC6689003; doi:10.1038/s41598-019-48043-1), 2019-08-09
Supplement: 41598_2019_48043_MOESM1_ESM.pdf [file 41598_2019_48043_MOESM1_ESM.pdf]

# Evaluation of AGP Fucosylation as a Marker for Hepatocellular Carcinoma of Three Different Etiologies

*Jing Liang<sup>1,2,§</sup>, Jianhui Zhu<sup>1,§</sup>, Mengmeng Wang<sup>1,3</sup>, Amit G. Singal<sup>4</sup>, Mobolaji Odewole<sup>4</sup>, Sofia Kagan<sup>4</sup>,  
Veronica Renteria<sup>4</sup>, Suyu Liu<sup>5</sup>, Neehar D. Parikh<sup>6</sup>, and David M. Lubman<sup>1\*</sup>*

<sup>1</sup>Department of Surgery, University of Michigan, Ann Arbor, MI 48109, USA

<sup>2</sup>School of Chemical Engineering and Technology, China University of Mining and Technology,  
Xuzhou, Jiangsu 221116, China

<sup>3</sup>Department of Emergency Medicine, Jinling Hospital, Medical School of Nanjing University, Nanjing,  
Jiangsu 210002, China

<sup>4</sup>Department of Internal Medicine, University of Texas Southwestern Medical Center, Dallas, TX 75390,  
USA

<sup>5</sup>Department of Biostatistics, University of Texas MD Anderson Cancer Center, Houston, TX 77030,  
USA

<sup>6</sup>Department of Internal Medicine, University of Michigan, Ann Arbor, MI 48109, USA

\* To whom correspondence should be addressed. David M. Lubman, Department of Surgery, University of Michigan Medical Center, 1150 West Medical Center Drive, Building MSRB1, Rm A510B, Ann Arbor, MI 48109-0656. Tel: 734-647-8834. Fax: 734-615-2088. Email: [dmlubman@umich.edu](mailto:dmlubman@umich.edu)

Supplemental Information

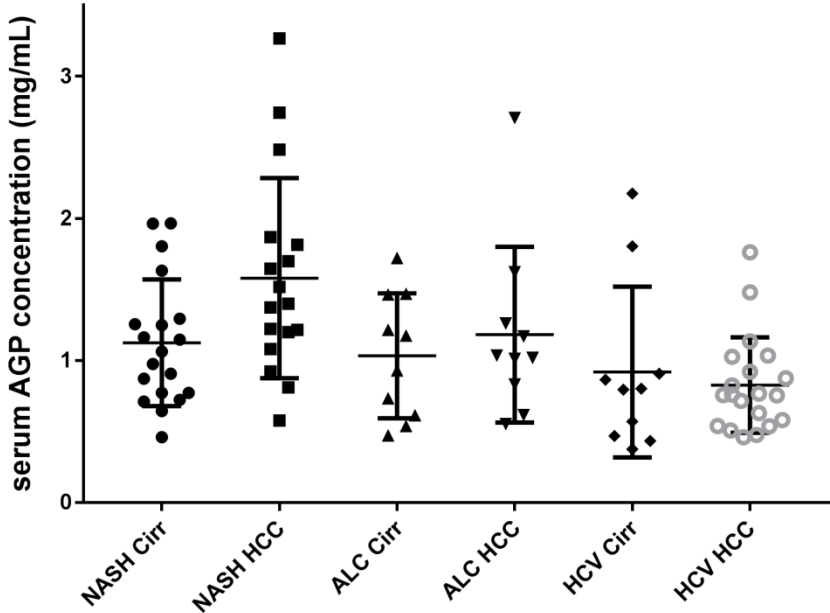

**Figure S1.** Scatter plot of serum AGP concentration measured by ELISA assay in patients with HCC or cirrhosis divided by the etiology, NASH, ALC, and HCV, respectively.

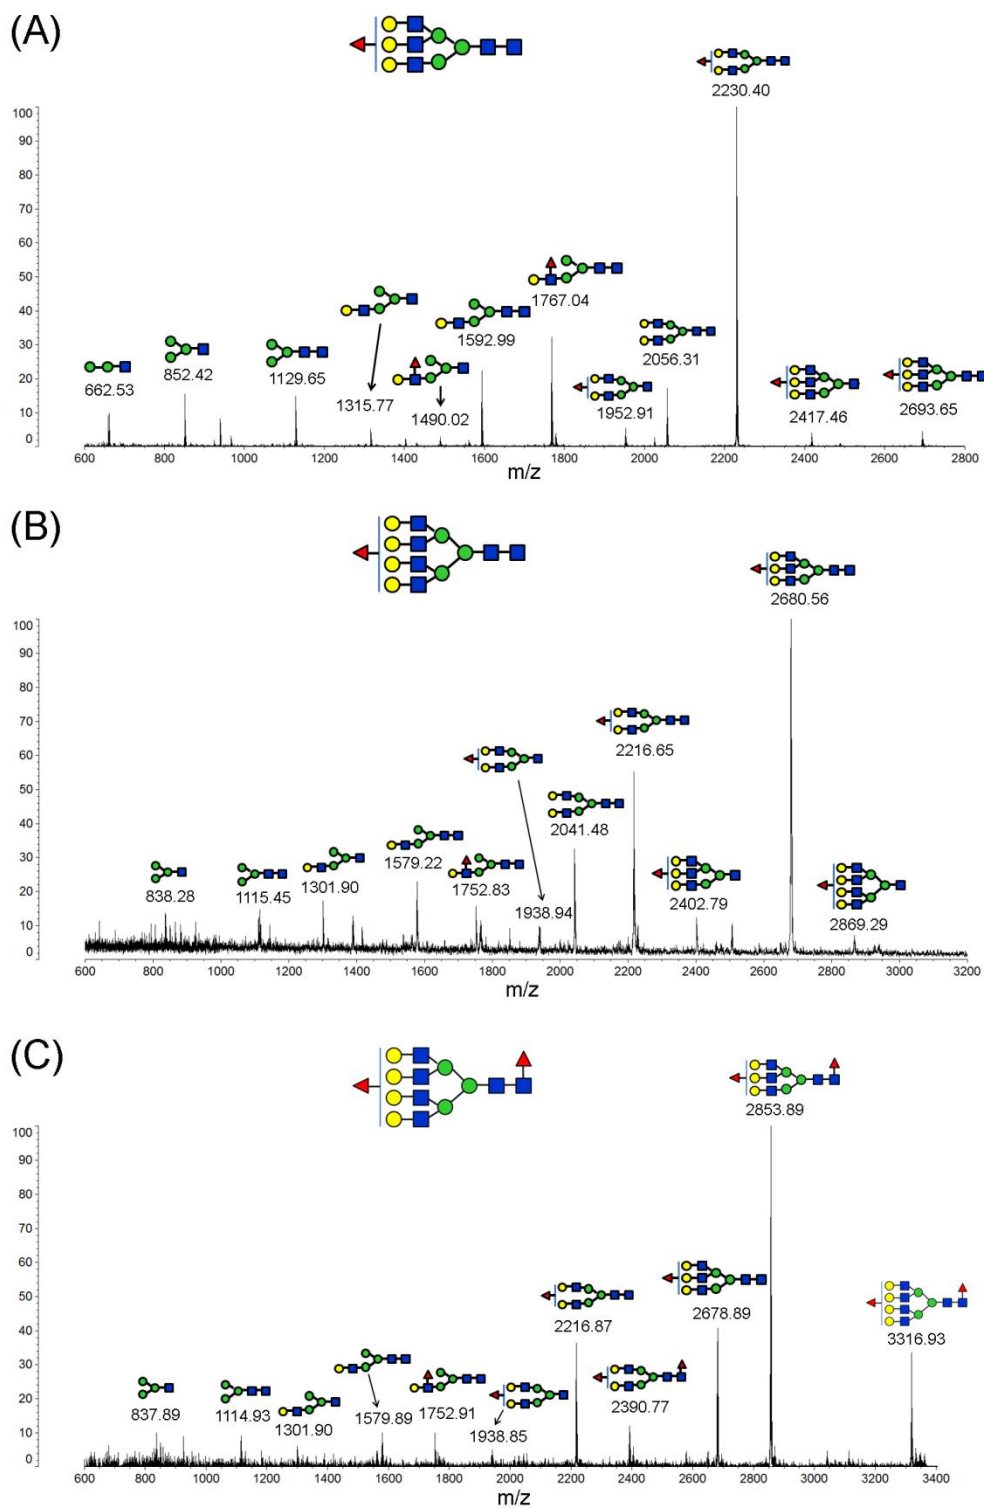

**Figure S2.** Representative MALDI-QIT-TOF MS/MS spectra of glycans at (A)  $m/z$  2693.65, (B)  $m/z$  3142.68, and (C)  $m/z$  3316.93 for glycan composition and core/antennary fucosylation assignment. Fragment ions are labeled with potential structures. (A) The mono-fucosylated tri-antennary glycan ( $m/z$

2693.65) is confirmed as antennary fucosylated, where a diagnostic peak at  $m/z$  1490.02 is the cleavage product of the peak at  $m/z$  1767.04 after loss of core GlcNAc, indicating no core fucose attached originally. (B) Fragment ions at  $m/z$  1938.94, 2402.79, and 2869.29 indicate antennary fucosylation for the mono-fucosylated tetra-antennary glycan ( $m/z$  3142.68). (C) The bifucosylated tetra-antennary glycan ( $m/z$  3316.93) is determined with both core and antennary fucosylation by the presence of a fragment ion at  $m/z$  1938.85 which is the product of the ion at  $m/z$  2390.77 after loss of core Fuc-GlcNAc, with one fucose attached to the antennae.

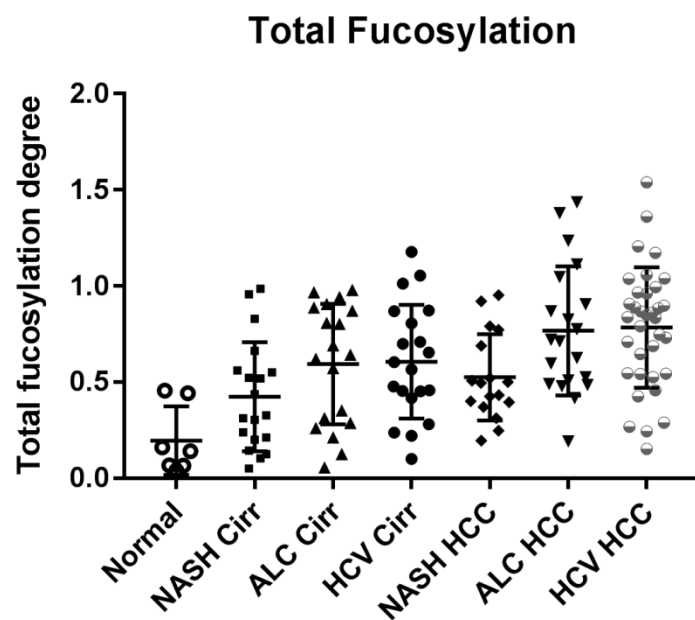

**Figure S3.** Scatter plot of the total fucosylation degree of AGP *N*-glycans in healthy subjects and patients with cirrhosis or HCC caused by NASH, ALC, and HCV, respectively.

**Table S1.** Branching degree and fucosylation degree of serum AGP in healthy control, HCC and cirrhosis patients of different etiologies.

|                        | <b>Branching Degree (% , mean)</b> |            |              | <b>Fucosylation Degree (% , mean)</b> |              |               |                 |
|------------------------|------------------------------------|------------|--------------|---------------------------------------|--------------|---------------|-----------------|
|                        | <b>Bi</b>                          | <b>Tri</b> | <b>Tetra</b> | <b>mono-Fc</b>                        | <b>bi-Fc</b> | <b>tri-Fc</b> | <b>total Fc</b> |
| <b>Healthy Control</b> | 17.3                               | 47.6       | 35.2         | 17.6                                  | 0.9          | 0.0           | 19.6            |
| NASH                   | 8.6                                | 45.8       | 45.6         | 31.1                                  | 4.9          | 0.5           | 42.4            |
| <b>Cirrhosis</b>       |                                    |            |              |                                       |              |               |                 |
| ALC                    | 10.8                               | 48.1       | 41.1         | 42.6                                  | 7.2          | 0.8           | 59.5            |
| HCV                    | 12.2                               | 41.9       | 45.9         | 41.3                                  | 7.8          | 1.3           | 60.6            |
| NASH                   | 10.6                               | 41.5       | 47.9         | 36.5                                  | 6.4          | 1.1           | 52.6            |
| <b>HCC</b>             |                                    |            |              |                                       |              |               |                 |
| ALC                    | 9.4                                | 44.3       | 46.2         | 44.7                                  | 12.3         | 2.4           | 76.7            |
| HCV                    | 11.7                               | 39.9       | 48.3         | 42.1                                  | 13.5         | 3.1           | 78.4            |
